# Supplementary material
Source: PubMed Central journal article supplement (PMC1567904)
Supplement: pnas_0605298103_1.pdf [file pnas_0605298103_1.pdf]

|                          |                 |                                 |
|--------------------------|-----------------|---------------------------------|
| <i>Homo sapiens</i>      | <b>miR-146a</b> | UGAGAACUGAAUUCCAUGGGUU          |
| <i>Mus musculus</i>      | miR-146         | UGAGAACUGAAUUCCAUGGGUU          |
| <i>Rattus norvegicus</i> | miR-146         | UGAGAACUGAAUUCCAUGGGUU          |
| <i>Gallus gallus</i>     | miR-146a        | UGAGAACUGAAUUCCAUGGGUU          |
| <i>Homo sapiens</i>      | <b>miR-146b</b> | UGAGAACUGAAUUCCAUA <b>AGGCU</b> |
| <i>Danio rerio</i>       | miR-146b        | UGAGAACUGAAUUCCA <b>AGGGUG</b>  |
| <i>Danio rerio</i>       | miR-146b        | UGAGAACUGAAUUCCA <b>AGGGUG</b>  |
| <i>Gallus gallus</i>     | miR-146b        | UGAGAACUGAAUUCCAUA <b>AGGCG</b> |
