# Supplementary material
Source: PubMed Central journal article supplement (PMC1567904)
Supplement: pnas_0605298103_2.pdf [file pnas_0605298103_2.pdf]

TRAF6:

cttgcocctcacttgctcaaaaaaactacctggagaaaaacagtgcctttccttgcocct**gttctc**aataaca  
tgcaaaacaacaagccacgggaaatatgtaatatctactagtgagtggtgTTAGAGAGGTCACCTTACTATT  
TCTTCCTGTTACAAATGATCTGAGGCAGTTTTTTTCTGGGAATCCACACGTTCCATGCTTTTTTCAGAAATG  
TTAGGCCTGAAGTGCCTGTGGCATGTTGCAGCAGCTATTTTGGCAGTTAGTATACCTCTTTTGTGTACTTT  
CTTGGGCTTTTTGCTCTGGTGTATTTTATGTTCAGAAAAGTCCAGACTCAAGAGTACTAAACTTTTTAATAATA  
ATGGATTTTTCTTAAACTTCAGTCTTTTTTGTAGTATTATATGTAATATATTTAAAAGTGAAAATCACTACC  
GCCTTGTGCTAGTGCCTTCGAGAAGAGTTATTGCTCTAGAAAAGTTGA**GTTCCTC**ATTTTTTTAACCTGTTAT  
AGATTTTCAGAGGATTTGAACCATAATCCTTGGAAAACTTAA**GTTCCTC**ATTCACCCCAGTTTTTCTCCAGG  
TTGTTACTAAGGATATTCAGGGATgagtttaaaccctaaatataaaccttaattattagtgtaaacatgct  
tgttgaataaacttgtttaagtgtt

IRAK1:

tgtgttcacctgggcagaTCCCCCAATCCGGAAGTCAA**GTTCCTC**ATGGTCAGAA**GTTCCTC**ATGGTGCAC  
GAGTCTCAGCACTCTGCCGCAGTGGGGGTGGGGGCCCATGCCCGGGGAGAGAAGGAGGTGGCCCTG  
CTGTTCTAGGCTCTGTGGGCATAGGCAGGCAGAGTGGAAACCTGCCTCCATGCCAGCATCTGGGGGCAAGG  
AAGGCTGGCATCATCCAGTGAAGGAGGCTGGCGCATGTTGGGAGGCTGCTGGCTGCACAGACCCGTGAGGGG  
AGGAGAGGGGCTGCTGTGCAGGGGTGTGGAGTAGGGAGCTGGCTCCCTGAGAGCCATGCAGGGCGTCTGC  
AGCCAGGCCTCTGGCAGCAGCTCTTTGCCATCTCTTTGGACAGTGGCCACCCCTGCACAATGGGGCCGAC  
GAGGCCTAGGGCCCTCTACCTGCTTACAATTTGGAAAAGTGTGGCCGGGTGCGGTGGCTCACGCCGTGTA  
TCCAGCACTTTGGGAGGCCAAGGCAGGAGGATCGCTGGAGCCAGTAGGTCAAGACCAGccagggcaaca  
tgatgagaccctgtctctgccaaaaaatttttaaactattagcctggcgtggtagcgcacgcctgtgggtc  
ccagctgctggggaggctgaagtaggaggatcatttatgctgggaggtcgaggctgcagtgagtcagtgat  
tgtatgactgcactccagcctggggtgacagagcaagaccctgttcaaaaagaaaaaccctgggaaaagt  
aagtatggctgtaagtctcatgggtcagtcctagcaagaagcgagaattctgagatcctccagaaagt  
gcagcaccacactccaacctcgggccaagtgtcttcaggctttactggggacctgcgagctggcctaagt  
gtggcctgcaagccaggccatccctgggcgccacagacgagctccgagccaggtcaggcttcggaggccac  
aagctcagcctcaggccaggcactgatgtggcagaggggccaactaccaaggtctagctaggcccaaga  
cctagttaccacagacagtgagaagcccctggaaggcagaaaaagttgggagcatggcagacaggggaagggaa  
acattttcagggaaaagacatgtatcacatgctcttcagaagcagtcaggtttcagtgtaaccgagtgctcct  
cttgcgtgtccaaaagtagccagggctgtagcacagccttcacagtgatlttgtgttcagccgtgagtc  
cactacatgcccccgtagagctgggcatgggtgacgtccaggttgtccttgagtaataaaaacgtatgttg  
c

COT/Tpl2/MAP3K8:

aggatgccatggttgctctaaattaagacagcattgatctcctggaggctggttctgctgcctctacacag  
gggcoctgTACAGTGAATGGTGCCATTTTTCGAAGGAGCAGTGTGACCTCCTGTGACCCCGTGAATGTGCCCTC  
CAAGCGGCCCTGTGTGTTTTGACATGTGAAGCTATTTGATATGCACCAGGTCCTCAAG**GTTCCTC**ATTTCTCAG  
GTGACGTGATTCTAAGGCAGGAATTTGAGAGTTACAGAAAGGATCGTGTCTGCTGACTGTTTTCAATCACTG  
TGCATTTGCTCAAAAATTTAAAAATACCAATCACAAAGGATAATAGAGTAGCCTAAAATTAATTTCTTGG  
TTCTTATTTAAGTATGGAATATTCATTTTACTCAGAATAGCTGTTTTGTGTATATTTGGTGTATATTTATATA  
ACTCTTTGAGCCTTTATTGGTAAATTTCTGGTATACATTTGAATTCATTATAAATTTGGGTGACTAGAACAAC  
TGAAGATTGTAGCAATAAGCTGGactagtgctcctaaaaatggcctaactgatgaattagaaccatctgaca  
gcaggccactagtgacagtttcttttgtgtcctatggaacattttataactgtacatgctatgctgaaga  
cattcaaaaacgtgatgttttgaatgtggataaaaactgtgtaaacacataatttttgtacatcccaagga  
tgagaatgtgacctttaagaaaaatgaaaacttttgtaaattattgatgatttttgaattccttatgactaa  
atthttcttttaagcattttgtatattaaaatagcatactgtgtatgttttatatcaaatgccttcatgaatc  
tttcatacatatataatgttaacattgtaaagtatgtgagtagctcttatgtaaagtatgtttttacatt  
atgcaataaaaacccaataacttttgtccaatgtggttgggtcaaatcaactgaataaattcagtatthttgcc  
tt
